# Supplementary material
Source: PubMed Central journal article supplement (PMC4630671)
Supplement: NIHMS729957-supplement-summplement.pdf [file NIHMS729957-supplement-summplement.pdf]

**Title:** Effect of Interior Loop Length on the Thermal Stability and pK<sub>a</sub> of i-Motif DNA

**Byline:** Samantha M. Reilly<sup>†</sup>, Rhianna K. Morgan<sup>‡</sup>, Tracy A. Brooks<sup>‡</sup>, & Randy M. Wadkins<sup>†,\*</sup>

<sup>†</sup>Department of Chemistry and Biochemistry, University of Mississippi, University, MS 38677

<sup>‡</sup>Department of BioMolecular Sciences, University of Mississippi, University, MS 38677

\*Corresponding Author: rwadkins@olemiss.edu

### **SUPPORTING INFORMATION**

The excluded volume of PEG-i-motif complexes was calculated using the shift in T<sub>m</sub> value of the i-motif in 40% PEG using the following equation (see reference 48).

$$T_M = T_M^o + \frac{RT_M^o{}^2}{\Delta H} (\Delta V_{EX}) * C_p$$

where T<sub>M</sub> is the average melting temperature in 40% PEG, T<sub>M</sub><sup>o</sup> is the average melting temperature without PEG, R is the gas constant, C<sub>p</sub> is the molar concentration of polymer, ΔH is the enthalpy of folding (-30 kcal/mol = -5 kcal/mol per base \* 6 bases for the i-motif), and ΔV<sub>EX</sub> is the calculated excluded volume. The results are given in table S1 and are in reasonable agreement with data on triplex DNA reported by Spink and Chaires (ref. 48).

**Table S1:** Calculated Excluded Volume of PEG-i-motif DNA complexes

| <b>Oligo</b> | <b>40% PEG-300<br/>(L/mol)</b> | <b>40% PEG-600<br/>(L/mol)</b> | <b>40% PEG-1500<br/>(L/mol)</b> | <b>40% PEG-3350<br/>(L/mol)</b> |
|--------------|--------------------------------|--------------------------------|---------------------------------|---------------------------------|
| Mod1T1       | 0.2                            | 0.5                            | 3.3                             | 7.2                             |
| Mod1T3       | 0.4                            | 1.2                            | 2.5                             | 7.6                             |
| Mod1T10      | 0.6                            | 2.2                            | 6.8                             | 16.3                            |
